# Supplementary material for: A Multi-Stage Approach for Cardiovascular Risk Assessment from Retinal Images Using an Amalgamation of Deep Learning and Computer Vision Techniques
Source: MDPI journal article supplement (doi:10.3390/diagnostics14090928), 2024-04-29
Supplement: s1 [file s1]

# A Multi-stage Approach for Cardiovascular Risk Assessment from Retinal Images using an Amalgamation of Deep Learning and Computer Vision Techniques

Deepthi K Prasad <sup>a</sup>, Madhura Prakash M <sup>a</sup>, Meghna S Kulkarni <sup>a</sup>, Spoorthi K <sup>a</sup>, Venkatakrishnan S <sup>a</sup>, Madhulika Chakravarthi <sup>b</sup> and Anusha Ramesh <sup>c</sup>

<sup>a</sup>Research and Development, Image Processing and Analysis, Forus Health Private Ltd, Bangalore, India

<sup>b</sup>Senior resident, Department of Cardiology, Apollo Hospitals, Bangalore, India

<sup>c</sup>Senior resident, Department of OBGyn, St. Johns Medical College, Bangalore, India

## Supplementary Material

**Table S1.** Pre-processing Algorithm-1 for Binary Cardio Risk Classification Model

|                                                                                                                                                                                                                                                                                                                                                                                                                                                                                                                                                                                                                                                                                                                                                                                                                                                                                                                                       |
|---------------------------------------------------------------------------------------------------------------------------------------------------------------------------------------------------------------------------------------------------------------------------------------------------------------------------------------------------------------------------------------------------------------------------------------------------------------------------------------------------------------------------------------------------------------------------------------------------------------------------------------------------------------------------------------------------------------------------------------------------------------------------------------------------------------------------------------------------------------------------------------------------------------------------------------|
| <p><b>Input Parameter:</b><br/>The function takes an input image (img_input) as its parameter</p> <p><b>Split Channels:</b><br/>Split the input image into its three-color channels: Blue (B), Green (G), and Red (R)<br/>CLAHE (Contrast Limited Adaptive Histogram Equalization) on Green Channel:<br/>Create a CLAHE object with a specified clip limit of 1.0 and tile grid size of (25,25)<br/>Apply CLAHE to the Green channel (G)</p> <p><b>Intensity Scaling on Green Channel:</b><br/>Multiply the CLAHE-enhanced green channel (C_G) by a scaling factor of 0.8. This step adjusts the intensity.</p> <p><b>Merge Channels:</b><br/>Merge the original blue channel (B), the updated green channel (updated_G), and the original red channel (R) to form the new BGR image</p> <p><b>Return Result:</b><br/>Return the final BGR image (img_new_bgr), where the green channel has undergone CLAHE and intensity scaling</p> |
|---------------------------------------------------------------------------------------------------------------------------------------------------------------------------------------------------------------------------------------------------------------------------------------------------------------------------------------------------------------------------------------------------------------------------------------------------------------------------------------------------------------------------------------------------------------------------------------------------------------------------------------------------------------------------------------------------------------------------------------------------------------------------------------------------------------------------------------------------------------------------------------------------------------------------------------|

Table S2. Masking and Cropping Algorithm

|                                                                                                                                                                                                                                                                                                                                                                                                                                                                                                                                                                                                                                                                                                                                                                                                                                                                                                                                                                                                                                                                                                                                                                                                                                                                                                                                                                                                                                                                                                                                                                                                                                                                                                     |
|-----------------------------------------------------------------------------------------------------------------------------------------------------------------------------------------------------------------------------------------------------------------------------------------------------------------------------------------------------------------------------------------------------------------------------------------------------------------------------------------------------------------------------------------------------------------------------------------------------------------------------------------------------------------------------------------------------------------------------------------------------------------------------------------------------------------------------------------------------------------------------------------------------------------------------------------------------------------------------------------------------------------------------------------------------------------------------------------------------------------------------------------------------------------------------------------------------------------------------------------------------------------------------------------------------------------------------------------------------------------------------------------------------------------------------------------------------------------------------------------------------------------------------------------------------------------------------------------------------------------------------------------------------------------------------------------------------|
| <p><b>Input Parameters:</b><br/>The function takes an image (img), a mask (mask_in), and a tolerance parameter (tol) as inputs</p> <p><b>Gray Scale Check:</b><br/>If the image is 2-dimensional (gray scale), create a binary mask where pixel values are greater than the specified tolerance (tol).<br/>Return the cropped image and corresponding mask using the computed binary mask.</p> <p><b>Color Image Processing:</b><br/>If the image is 3-dimensional (color), convert the image to grayscale Create a binary mask based on the grayscale image where pixel values are greater than the specified tolerance (tol)</p> <p><b>Check Cropped Image Shape:</b><br/>Check the shape of the first channel of the original image after applying the binary mask<br/>If the resulting shape is zero, the image is too dark, so return the original image and mask.</p> <p><b>Extract Channels and Stack:</b><br/>If the image is not too dark, extract each channel separately based on the binary mask.<br/>Stack the three channels together to form the cropped color image.</p> <p><b>Handling Mask Channels:</b><br/>Try to extract each channel from the input mask (mask_in) based on the binary mask.<br/>If successful, stack the three mask channels together. If unsuccessful (due to different sizes), use the original mask.</p> <p><b>Additional Handling for Shape Mismatch:</b><br/>Check if the width dimension of the original image (shape) is not equal to the width dimension of the input mask (mask_in.shape[1]). If unequal, use the original mask (mask_in)</p> <p><b>Result:</b><br/>Return the final cropped color image (img) and the corresponding mask (msk)</p> |
|-----------------------------------------------------------------------------------------------------------------------------------------------------------------------------------------------------------------------------------------------------------------------------------------------------------------------------------------------------------------------------------------------------------------------------------------------------------------------------------------------------------------------------------------------------------------------------------------------------------------------------------------------------------------------------------------------------------------------------------------------------------------------------------------------------------------------------------------------------------------------------------------------------------------------------------------------------------------------------------------------------------------------------------------------------------------------------------------------------------------------------------------------------------------------------------------------------------------------------------------------------------------------------------------------------------------------------------------------------------------------------------------------------------------------------------------------------------------------------------------------------------------------------------------------------------------------------------------------------------------------------------------------------------------------------------------------------|

Table S3. Pre-Processing Algorithm for Vessel Enhancement

|                                                                                                                                                                                                                                                                                                                                                                                                                                                                                                                                                                                                                                                                                                                                                                                  |
|----------------------------------------------------------------------------------------------------------------------------------------------------------------------------------------------------------------------------------------------------------------------------------------------------------------------------------------------------------------------------------------------------------------------------------------------------------------------------------------------------------------------------------------------------------------------------------------------------------------------------------------------------------------------------------------------------------------------------------------------------------------------------------|
| <p><b>Input Parameter:</b><br/>The function takes an Image as input.</p> <p><b>Gamma Adjustment:</b><br/>Define a nested function adjust_gamma(image, gamma) to perform gamma adjustment on the input image.<br/>Calculate invGamma as the inverse of the specified gamma value.<br/>Create a lookup table using NumPy to adjust pixel values in the range [0, 255].<br/>Apply the lookup table using OpenCV's LUT (Look-Up Table) function to adjust the gamma of the image.</p> <p><b>Image Conversion and CLAHE:</b><br/>Assign the input image to the variable img.<br/>Create a Contrast Limited Adaptive Histogram Equalization (CLAHE) object using cv2.createCLAHE with specified parameters (clipLimit=2.5 and tileGridSize= (15,15))</p> <p><b>Split Channels:</b></p> |
|----------------------------------------------------------------------------------------------------------------------------------------------------------------------------------------------------------------------------------------------------------------------------------------------------------------------------------------------------------------------------------------------------------------------------------------------------------------------------------------------------------------------------------------------------------------------------------------------------------------------------------------------------------------------------------------------------------------------------------------------------------------------------------|

Extract three color channels (C1, C2, C3) from the image array.

**CLAHE Application:**

Apply CLAHE separately to the second channel (C2) using `clahe.apply` and store the result in CH1.

Merge Channels:

Merge the modified second channel (CH1) with the other two channels to form a new image (AA)

**Gamma Adjustment on Merged Image:**

Apply the previously defined gamma adjustment function (`adjust_gamma`) to the merged image (AA) with a specified gamma value of 2.5.

**Convert to Grayscale:**

Convert the gamma-adjusted image (gi) to grayscale

**Merge Grayscale Channels:**

Merge the grayscale image (gi) with itself to form a 3-channel grayscale image (Gi)

**Return Result:**

Return the final processed image (Gi) as the output of the function.

| Layer (type)                              | Output Shape          | Param # |
|-------------------------------------------|-----------------------|---------|
| input_2 (InputLayer)                      | [(None, 224, 224, 3)] | 0       |
| batch_normalization (Batch Normalization) | (None, 224, 224, 3)   | 12      |
| efficientnetb0 (Functional)               | (None, 7, 7, 1280)    | 4049571 |
| conv2d (Conv2D)                           | (None, 7, 7, 128)     | 163968  |
| flatten (Flatten)                         | (None, 6272)          | 0       |
| dropout (Dropout)                         | (None, 6272)          | 0       |
| dense (Dense)                             | (None, 512)           | 3211776 |
| dropout_1 (Dropout)                       | (None, 512)           | 0       |
| dense_1 (Dense)                           | (None, 1)             | 513     |
| Total params: 7,425,840                   |                       |         |
| Trainable params: 7,383,811               |                       |         |
| Non-trainable params: 42,029              |                       |         |

Figure S1. Binary Cardio Risk Classification Model Summary
